# Supplementary material for: Modeling the drying process of Masson pine needle fuel beds under different packing ratios based on two-phase models in the laboratory
Source: PeerJ. 2022 Dec 5;10:e14484. doi: 10.7717/peerj.14484 (PMC9745954; doi:10.7717/peerj.14484)
Supplement: Supplemental Information 1 [file peerj-10-14484-s001.xlsx]

## Sheet: drying process
time(h)	packing ratio: 0.016				packing ratio:0.021				packing ratio:0.027				packing ratio:0.040				packing ratio:0.061
	1	2	3		1	2	3		1	2	3		1	2	3		1	2	3
0	0.9906	0.9292	0.9966		0.9796	0.9985	0.98		0.9802	0.9898	1.0158		0.98848	0.98439	0.989874		0.99076	0.99936	0.988843
0.166667	0.926645	0.903554	0.984026		0.952812	0.96486	0.960037		0.980449	0.957111	0.982031		0.98174		0.974771		0.990647	0.995899	0.975284
0.333333	0.87253	0.868127	0.96428		0.928284	0.927463	0.929536		0.954525	0.938249	0.95499		0.958678		0.958311		0.969517	0.988387	0.962102
0.5	0.823562	0.835317	0.946736		0.904823	0.892919	0.903469		0.927788	0.921588	0.931808		0.938081		0.944727		0.950981	0.981969	0.950256
0.666667	0.777512	0.803719	0.927899		0.880809	0.860858	0.879823		0.903999	0.903635	0.908976		0.919391		0.932156		0.933795	0.975039	0.939305
0.833333	0.735756	0.778926	0.912999		0.85977	0.831363	0.858108		0.880609	0.883929	0.88809		0.900474		0.919552		0.916617	0.96838	0.92866
1	0.696972	0.749972	0.897769		0.838957	0.801375	0.838116		0.857648	0.86993	0.868304		0.883732		0.907767		0.898486	0.96177	0.918682
1.16667	0.661051	0.725482	0.883476		0.81913	0.774631	0.820915		0.837683	0.855437	0.845871		0.866139		0.896574		0.882154	0.955522	0.909096
1.33333	0.627058	0.701653	0.869292		0.800677	0.748584	0.801827		0.817973	0.841916	0.830293		0.850678		0.886093		0.867647	0.94936	0.900007
1.5	0.597165	0.677796	0.853787		0.781732	0.725308	0.786268		0.799283	0.825845	0.815099		0.835519		0.876161		0.85494	0.941905	0.891174
1.66667	0.569557	0.657603	0.839356		0.765148	0.702073	0.770546		0.780943	0.812404	0.798278		0.821221		0.865798		0.842488	0.936112	0.882568
1.83333	0.542802	0.639394	0.83057		0.74842	0.681096	0.757553		0.762906	0.798549	0.784694		0.807655		0.855909		0.828543	0.930512	0.87419
2	0.520066	0.621653	0.820325		0.732697	0.661268	0.743904		0.749426	0.785045	0.770791		0.794304		0.84616		0.816041	0.925352	0.866686
2.16667	0.497055	0.603747	0.810548		0.717344	0.643658	0.729392		0.735453	0.772385	0.757063		0.781385		0.837003		0.804819	0.919709	0.85884
2.33333	0.476301	0.587934	0.800826		0.702627	0.625308	0.715291		0.720459	0.759598	0.744818		0.769434		0.828374		0.794819	0.913952	0.851386
2.5	0.457859	0.572149	0.791958		0.689614	0.609996	0.704721		0.703171	0.747066	0.732653		0.758075		0.818906		0.784534	0.907982	0.844628
2.66667	0.44093	0.558375	0.781465		0.674425	0.592652	0.695115		0.689994	0.735284	0.721508		0.746738		0.810525		0.773696	0.902466	0.837578
2.83333	0.42447	0.543113	0.773065		0.660878	0.578571	0.68477		0.6779	0.723294	0.710714		0.736456		0.802295		0.7629	0.896802	0.830884
3	0.409716	0.530771	0.76439		0.649384	0.563896	0.674589		0.667336	0.711655	0.699665		0.726077		0.794021		0.754428	0.891173	0.824638
3.16667	0.395954	0.517658	0.756155		0.637069	0.550821	0.664922		0.654987	0.700686	0.689509		0.716118		0.786631		0.745579	0.885451	0.818249
3.33333	0.383072	0.507355	0.747948		0.624938	0.537664	0.655419		0.640137	0.690513	0.680038		0.706923		0.778875		0.737868	0.880277	0.811796
3.5	0.370328	0.494821	0.739603		0.612911	0.525144	0.646182		0.632059	0.679879	0.670823		0.697545		0.771259		0.728593	0.87506	0.806147
3.66667	0.359978	0.482975	0.732498		0.602915	0.515312	0.637131		0.619041	0.669308	0.662245		0.688706		0.763029		0.719311	0.870014	0.800497
3.83333	0.348637	0.474904	0.724897		0.591933	0.503654	0.629228		0.610771	0.659056	0.652822		0.680071		0.756372		0.711905	0.865345	0.794628
4	0.340242	0.465179	0.716965		0.581117	0.493165	0.621305		0.60196	0.650032	0.643941		0.672556		0.749337		0.704442	0.859957	0.78976
4.16667	0.330223	0.454986	0.711237		0.570895	0.482656	0.612131		0.593993	0.640816	0.635906		0.66433		0.742723		0.696731	0.854833	0.784245
4.33333	0.318029	0.445537	0.704765		0.56092	0.473461	0.604516		0.582967	0.631186	0.627535		0.656277		0.736217		0.689303	0.84973	0.778326
4.5	0.311175	0.436612	0.697852		0.552771	0.464984	0.596408		0.574219	0.621445	0.620727		0.649268		0.729678		0.683106	0.845444	0.774204
4.66667	0.306496	0.429118	0.692206		0.542303	0.456342	0.58906		0.567033	0.613584	0.61317		0.641473		0.722956		0.678031	0.840163	0.769152
4.83333	0.298899	0.419945	0.684632		0.533641	0.448789	0.582471		0.55819	0.604783	0.605501		0.634561		0.716083		0.672886	0.835963	0.764227
5	0.292788	0.412948	0.678491		0.523974	0.440086	0.576396		0.547116	0.596684	0.598549		0.62739		0.710158		0.668088	0.830931	0.759565
5.16667	0.28654	0.405647	0.672294		0.516195	0.432574	0.568227		0.541778	0.588249	0.592156		0.62065		0.703749		0.663106	0.826745	0.755138
5.33333	0.280539	0.399669	0.66753		0.508005	0.424836	0.560612		0.531692	0.579895	0.585124		0.614449		0.698416		0.658088	0.822289	0.750569
5.5	0.276218	0.389697	0.660479		0.499261	0.418083	0.553777		0.524044	0.572545	0.578858		0.60744		0.692179		0.653397	0.817839	0.745665
5.66667	0.269777	0.384656	0.65398		0.489594	0.412131	0.547414		0.514324	0.56376	0.572608		0.601281		0.686567		0.648721	0.813412	0.741451
5.83333	0.264079	0.379339	0.64949		0.482718	0.4047	0.541174		0.507282	0.55668	0.566342		0.594649		0.681073		0.644129	0.808842	0.737436
6	0.259565	0.37281	0.644037		0.476683	0.39922	0.534729		0.503139	0.550016	0.560092		0.588641		0.675159		0.639446	0.805053	0.732987
6.16667	0.255904	0.367328	0.640402		0.4672	0.391092	0.528366		0.498757	0.542251	0.553635		0.583258		0.669708		0.635025	0.800462	0.729299
6.33333	0.251473	0.361928	0.633903		0.461946	0.386679	0.522475		0.492113	0.536304	0.547258		0.577143		0.663395		0.631087	0.796375	0.724957
6.5	0.24817	0.357989	0.626769		0.454228	0.380952	0.516174		0.484767	0.530485	0.542347		0.571479		0.657697		0.626709	0.792047	0.720878
6.66667	0.243463	0.351488	0.622776		0.447681	0.374364	0.509893		0.479063	0.522752	0.537245		0.565924		0.652849		0.621983	0.788124	0.717183
6.83333	0.239802	0.346061	0.618067		0.441174	0.368514	0.504228		0.471702	0.516358	0.531999		0.560088		0.647894		0.618038	0.78403	0.713275
7	0.236389	0.34022	0.61198		0.434072	0.365374	0.500144		0.464659	0.510906	0.526323		0.554468		0.642195		0.614037	0.779758	0.709693
7.16667	0.232232	0.336722	0.607959		0.427319	0.359298	0.49218		0.45964	0.503874	0.520791		0.549655		0.637294		0.608842	0.775984	0.70582
7.33333	0.230168	0.331846	0.60325		0.422044	0.354105	0.486576		0.455895	0.498182	0.516614		0.544789		0.632683		0.604812	0.771699	0.702601
7.5	0.227746	0.325758	0.598458		0.415415	0.348625	0.481999		0.450032	0.492172	0.510842		0.53975		0.628256		0.601535	0.768486	0.698373
7.66667	0.224388	0.321102	0.592839		0.409544	0.344971	0.475759		0.442256	0.485985	0.506505		0.53483		0.623042		0.598159	0.764172	0.695026
7.83333	0.221855	0.317713	0.590223		0.402956	0.341112	0.471244		0.438767	0.480533	0.501307		0.529619		0.620101		0.594741	0.760391	0.69165
8	0.220039	0.314766	0.58444		0.39727	0.336289	0.465702		0.433525	0.475733	0.497114		0.524483		0.61381		0.590121	0.756389	0.687514
8.16667	0.218332	0.308815	0.580859		0.391933	0.330973	0.461289		0.42637	0.472162	0.492347		0.521382		0.608995		0.586446	0.752722	0.684309
8.33333	0.214946	0.305785	0.576618		0.387315	0.32734	0.457656		0.420969	0.46486	0.487787		0.514653		0.60474		0.58253	0.749069	0.680912
8.5	0.213405	0.301625	0.571495		0.381917	0.323748	0.452976		0.415758	0.458355	0.483291		0.510745		0.600011		0.578692	0.744769	0.677352
8.66667	0.210322	0.298375	0.566979		0.376232	0.319314	0.44608		0.411584	0.453412	0.479735		0.505943		0.595766		0.575195	0.7415	0.674439
8.83333	0.209469	0.295565	0.562655		0.370443	0.316646	0.441441		0.407106	0.45	0.476084		0.501238		0.591975		0.571066	0.737839	0.670829
9	0.207652	0.290799	0.558744		0.366297	0.3117	0.437541		0.401211	0.444483	0.471381		0.496942		0.587084		0.568031	0.734321	0.667652
9.16667	0.204652	0.287576	0.553319		0.360447	0.309031	0.434585		0.395602	0.439652	0.467538		0.492959		0.583087		0.564357	0.73049	0.664973
9.33333	0.204872	0.284242	0.550041		0.355952	0.305665	0.428818		0.391332	0.434423	0.464126		0.487586		0.578563		0.560675	0.727477	0.661839
9.5	0.201954	0.281102	0.546764		0.350041	0.30156	0.424446		0.386393	0.430214	0.460172		0.483613		0.574373		0.557193	0.723603	0.658194
9.66667	0.207514	0.277741	0.541862		0.346264	0.297147	0.418883		0.384799	0.425813	0.455883		0.479167		0.570365		0.55366	0.7201	0.655443
9.83333	0.203771	0.275455	0.538061		0.343144	0.294232	0.416318		0.377884	0.422242	0.452647		0.475334		0.567241		0.55049	0.716958	0.652466
10	0.198293	0.271543	0.53393		0.337664	0.291975	0.411823		0.366236	0.417459	0.448661		0.471049		0.56248		0.546603	0.713703	0.649453
10.1667	0.196642	0.270799	0.529799		0.333128	0.287623	0.408456		0.361536	0.414429	0.445998		0.466979		0.558893		0.543625	0.709758	0.646738
10.3333	0.195211	0.26573	0.526164		0.329208	0.285324	0.403695		0.357393	0.409359	0.443064		0.463275		0.554788		0.54064	0.707413	0.642503
10.5	0.19488	0.262479	0.523547		0.324795	0.282061	0.399713		0.354222	0.405038	0.439397		0.459367		0.551233		0.537413	0.703845	0.640065
10.6667	0.193311	0.260937	0.519306		0.321326	0.284298	0.395197		0.349235	0.401419	0.436033		0.455717		0.547582		0.533845	0.700469	0.637671
10.8333	0.191192	0.25741	0.515946		0.316071	0.278305	0.391318		0.345889	0.397927	0.43192		0.452003		0.54338		0.530867	0.697242	0.635162
11	0.191082	0.253774	0.51187		0.31328	0.276909	0.388485		0.34095	0.393033	0.428492		0.448019		0.539642		0.527477	0.693845	0.632163
11.1667	0.19144	0.250854	0.508785		0.309832	0.270628	0.384811		0.336887	0.389445	0.425909		0.444251		0.535958		0.524179	0.690654	0.629122
11.3333	0.190504	0.249174	0.505728		0.305213	0.267796	0.380439		0.333971	0.385874	0.422911		0.440084		0.533211		0.521372	0.687385	0.626414
11.5	0.188825	0.247355	0.500936		0.303715	0.265969	0.377586		0.332154	0.381904	0.420153		0.437059		0.530324		0.517655	0.684641	0.623387
11.6667	0.189155	0.243967	0.49832		0.298604	0.264183	0.374795		0.326737	0.378922	0.416837		0.432989		0.52817		0.514861	0.681478	0.621084
11.8333	0.187586	0.242149	0.495566		0.295012	0.260427	0.369807		0.324363	0.37457	0.4136		0.429522		0.524938		0.512395	0.678166	0.618377
12	0.188329	0.238898	0.491325		0.292919	0.257902	0.366851		0.321017	0.371763	0.410188		0.426174		0.520769		0.508948	0.675508	0.615897
12.1667	0.189513	0.236777	0.486422		0.288793	0.257389	0.36523		0.318419	0.369372	0.407765		0.422653		0.516126		0.505856	0.673966	0.613445
12.3333	0.186485	0.234656	0.484825		0.286002	0.25353	0.358764		0.314532	0.365003	0.404943		0.419563		0.513293		0.502935	0.669701	0.610858
12.5	0.184999	0.23281	0.481961		0.281979	0.252319	0.357328		0.311185	0.361862	0.40161		0.416268		0.509534		0.4999	0.666674	0.608421
12.6667	0.185769	0.231295	0.479097		0.279721	0.250924	0.353202		0.307154	0.358371	0.398613		0.41306		0.506043		0.497065	0.663454	0.606055
12.8333	0.187228	0.229587	0.474002		0.276498	0.248686	0.350369		0.304461	0.356138	0.395313		0.409744		0.502693		0.494307	0.660284	0.60324
13	0.185274	0.226612	0.471303		0.272947	0.245259	0.346162		0.302772	0.353316	0.394627		0.406848		0.499957		0.49199	0.657733	0.601066
13.1667	0.183622	0.223306	0.468686		0.270895	0.244068	0.342837		0.299267	0.349809	0.391087		0.40379		0.497038		0.488891	0.654982	0.598742
13.3333	0.184668	0.222369	0.466786		0.268103	0.242406	0.34023		0.297785	0.345552	0.388106		0.399935		0.493235		0.485913	0.651869	0.596653
13.5	0.185191	0.220386	0.46282		0.26523	0.239573	0.337644		0.29275	0.34316	0.385475		0.397265		0.490488		0.483532	0.648934	0.594038
13.6667	0.182631	0.21854	0.463867		0.2633	0.239347	0.33477		0.290758	0.339828	0.382749		0.394315		0.487202		0.480753	0.645856	0.591728
13.8333	0.183182	0.215895	0.461058		0.259893	0.236392	0.331424		0.289994	0.336974	0.38058		0.391171		0.48591		0.477548	0.643724	0.58939
14	0.183182	0.213967	0.456706		0.25743	0.235837	0.327114		0.286313	0.333689	0.378332		0.387748		0.481644		0.475345	0.640682	0.587479
14.1667	0.182549	0.213003	0.455109		0.254906	0.233395	0.325616		0.283811	0.33125	0.374474		0.385347		0.479457		0.4729	0.638173	0.584871
14.3333	0.183292	0.211873	0.448113		0.25351	0.23204	0.32266		0.282202	0.32795	0.371987		0.38259		0.476042		0.470355	0.635579	0.582824
14.5	0.183567	0.209669	0.448416		0.25156	0.229926	0.320525		0.280051	0.324554	0.370026		0.379511		0.473123		0.467527	0.632843	0.580173
14.6667	0.181971	0.209174	0.441972		0.248399	0.229351	0.3164		0.279207	0.322465	0.368431		0.37725		0.470257		0.464883	0.630227	0.578269
14.8333	0.18332	0.208292	0.440567		0.245813	0.227443	0.313916		0.278107	0.320536	0.36529		0.373719		0.466918		0.463006	0.627427	0.575867
15	0.182686	0.205372	0.437868		0.243329	0.225287	0.311289		0.275494	0.317857	0.362739		0.371393		0.464699		0.460064	0.625117	0.573721
15.1667	0.18153	0.203278	0.434233		0.242508	0.224548	0.308662		0.273789	0.314668	0.360523		0.368497		0.462372		0.45774	0.622353	0.571632
15.3333	0.182521	0.20124	0.431259		0.240538	0.223276	0.30663		0.270379	0.312596	0.358147		0.365213		0.458472		0.455018	0.619446	0.569876
15.5	0.182576	0.200689	0.427375		0.238424	0.221675	0.303633		0.268658	0.310252	0.356298		0.363157		0.45648		0.453035	0.617406	0.567595
15.6667	0.182108	0.199532	0.425282		0.235181	0.219992	0.301293		0.269344	0.306983	0.354385		0.361208		0.452828		0.450092	0.614762	0.565364
15.8333	0.182494	0.197218	0.42363		0.233764	0.21798	0.298686		0.265392	0.305182	0.351706		0.359388		0.451277		0.447598	0.612104	0.56309
16	0.183154	0.19697	0.421592		0.231691	0.218555	0.295115		0.266252	0.301594	0.349123		0.355136		0.44812		0.445402	0.609524	0.561121
16.1667	0.181145	0.195124	0.417598		0.230357	0.21681	0.294068		0.264277	0.300048	0.34713		0.353025		0.446494		0.443106	0.607008	0.558734
16.3333	0.181283	0.194132	0.415313		0.228736	0.215948	0.29179		0.264277	0.297864	0.345153		0.350301		0.443499		0.44037	0.604072	0.556687
16.5	0.1812	0.19303	0.413164		0.227094	0.215312	0.289163		0.259401	0.294563	0.34418		0.348213		0.441312		0.438131	0.601905	0.554591
16.6667	0.180264	0.191295	0.409694		0.225205	0.213649	0.287931		0.26007	0.292251	0.341199		0.345833		0.438511		0.436318	0.599559	0.552551
16.8333	0.180457	0.191295	0.407408		0.224076	0.212562	0.284175		0.258716	0.291741	0.339445		0.34255		0.435517		0.434179	0.597086	0.551073
17	0.18087	0.189091	0.406252		0.22227	0.211166	0.283025		0.25204	0.288712	0.3375		0.340299		0.432554		0.43172	0.59467	0.54828
17.1667	0.180347	0.188953	0.402368		0.220402	0.210078	0.279967		0.251052	0.285666	0.335523		0.339147		0.431455		0.428834	0.59221	0.546561
17.3333	0.180072	0.187603	0.401322		0.218966	0.210037	0.277791		0.24702	0.284184	0.333626		0.338189		0.428084		0.427043	0.589673	0.544834
17.5	0.180457	0.185813	0.398678		0.217939	0.208662	0.276232		0.248423	0.281744	0.331234		0.333667		0.426015		0.425188	0.588195	0.542211
17.6667	0.178943	0.184463	0.395786		0.216646	0.20702	0.273933		0.247642	0.280118	0.328922		0.331105		0.423462		0.422999	0.584563	0.540229
17.8333	0.179466	0.182452	0.393886		0.21484	0.206979	0.270977		0.24616	0.27795	0.327822		0.329253		0.421071		0.421045	0.582587	0.538438
18	0.180072	0.1827	0.391159		0.212521	0.205993	0.269376		0.243372	0.27543	0.324984		0.327293		0.419121		0.418472	0.580483	0.537081
18.1667	0.179714	0.181377	0.391132		0.211392	0.205501	0.267262		0.239691	0.273422	0.322927		0.324688		0.416493		0.41634	0.57764	0.5348
18.3333	0.179741	0.17989	0.387497		0.20975	0.204639	0.266071		0.237859	0.272018	0.321668		0.322416		0.414489		0.414392	0.575338	0.533016
18.5	0.180402	0.179614	0.38287		0.208805	0.204002	0.263773		0.237396	0.269165	0.319898		0.320198		0.41171		0.412523	0.573412	0.530884
18.6667	0.179383	0.178264	0.382126		0.208046	0.202525	0.262172		0.233094	0.267522	0.317076		0.318357		0.4099		0.410171	0.570853	0.529349
18.8333	0.179906	0.17865	0.378546		0.205316	0.202833	0.259216		0.231931	0.266948	0.316821		0.316182		0.407067		0.408351	0.568443	0.527374
19	0.179796	0.176887	0.376948		0.20158	0.202299	0.257923		0.228872	0.264302	0.314381		0.314007		0.405149		0.406276	0.566389	0.525249
19.1667	0.178915	0.176446	0.374415		0.201786	0.201108	0.255439		0.226976	0.262229	0.311894		0.312349		0.403092		0.404428	0.564222	0.523579
19.3333	0.179191	0.175096	0.372019		0.201067	0.200718	0.253695		0.22441	0.261527	0.311049		0.310088		0.40125		0.40263	0.561692	0.521553
19.5	0.179273	0.174876	0.369953		0.200185	0.199384	0.252032		0.22014	0.259136	0.309694		0.308269		0.398664		0.400235	0.559574	0.519933
19.6667	0.179383	0.173526	0.366924		0.199692	0.199364	0.249651		0.217177	0.25625	0.307031		0.305803		0.397178		0.398088	0.557328	0.517723
19.8333	0.179163	0.171653	0.366208		0.197024	0.198296	0.247188		0.213209	0.253986	0.30582		0.304328		0.395346		0.395984	0.55521	0.516309
20	0.178723	0.170716	0.363233		0.197352	0.198194	0.246408		0.218069	0.252918	0.304305		0.302864		0.393095		0.394513	0.55307	0.514312
20.1667	0.178503	0.171295	0.361223		0.195895	0.197126	0.244971		0.216555	0.251403	0.302583		0.300829		0.391404		0.392345	0.551059	0.512514
20.3333	0.179576	0.170799	0.358303		0.195484	0.196757	0.243165		0.216635	0.249793	0.300989		0.299106		0.389357		0.390583	0.548863	0.510986
20.5	0.179081	0.169752	0.357119		0.193924	0.1961	0.241359		0.212827	0.248406	0.298422		0.296576		0.387687		0.388785	0.546674	0.509288
20.6667	0.178558	0.169394	0.355467		0.193165	0.195218	0.238588		0.214261	0.246843	0.298661		0.293637		0.385651		0.386752	0.544357	0.507369
20.8333	0.180017	0.169697	0.351005		0.192816	0.195341	0.238855		0.216714	0.245169	0.295982		0.293508		0.383809		0.385146	0.542452	0.505607
21	0.180374	0.168017	0.350978		0.191318	0.194048	0.235776		0.214516	0.243256	0.295249		0.292819		0.381364		0.383255	0.540206	0.503873
21.1667	0.179383	0.169201	0.347866		0.190374	0.193658	0.235694		0.215631	0.24155	0.293654		0.291171		0.377852		0.381343	0.537861	0.502139
21.3333	0.179934	0.167383	0.345084		0.189204	0.193288	0.233826		0.214245	0.24316	0.292156		0.289869		0.37726		0.379424	0.535935	0.500505
21.5	0.180154	0.166419	0.343294		0.188875	0.192529	0.231917		0.213082	0.239286	0.290753		0.287306		0.376064		0.377555	0.533873	0.49909
21.6667	0.180897	0.166171	0.342302		0.187479	0.192118	0.230234		0.212811	0.237245	0.289318		0.286326		0.373252		0.375323	0.531713	0.497108
21.8333	0.179796	0.167603	0.339769		0.186761	0.190825	0.228017		0.209449	0.235045	0.288265		0.28525		0.372003		0.373618	0.529659	0.495445
22	0.179824	0.166033	0.339135		0.185447	0.191523	0.227011		0.205402	0.234646	0.286209		0.28259		0.370214		0.372395	0.527413	0.493974
22.1667	0.179576	0.165262	0.336822		0.185694	0.189799	0.224897		0.208158	0.232988	0.285108		0.281385		0.367888		0.370547	0.525778	0.491657
22.3333	0.178888	0.165565	0.334316		0.183888	0.190702	0.224733		0.212651	0.231776	0.283514		0.279866		0.366681		0.368557	0.525359	0.490151
22.5	0.179273	0.16438	0.331727		0.183518	0.189696	0.223091		0.201322	0.230485	0.282813		0.278445		0.364548		0.366866	0.522445	0.48853
22.6667	0.1782	0.164738	0.33035		0.181753	0.189039	0.221716		0.194901	0.229735	0.281601		0.27697		0.363094		0.364805	0.519502	0.486946
22.8333	0.17875	0.164408	0.330625		0.182122	0.188424	0.219889		0.200956	0.228061	0.279592		0.27514		0.361553		0.362459	0.517456	0.484743
23	0.178585	0.16292	0.327761		0.18124	0.186433	0.218986		0.203155	0.228029	0.279002		0.273633		0.359571		0.361073	0.515885	0.483172
23.1667	0.177649	0.16281	0.328202		0.181322	0.185632	0.217447		0.205226	0.225303	0.277136		0.272147		0.358106		0.35951	0.514009	0.481609
23.3333	0.177126	0.161928	0.327265		0.180583	0.187582	0.215846		0.205688	0.223438	0.275781		0.271329		0.356361		0.357896	0.511883	0.47996
23.5	0.179218	0.162176	0.32341		0.179803	0.187295	0.215168		0.201195	0.223581	0.274793		0.269811		0.354993		0.356283	0.510377	0.47824
23.6667	0.177457	0.161129	0.322088		0.179064	0.187254	0.21408		0.20333	0.221269	0.27382		0.268131		0.353431		0.354364	0.507925	0.477317
23.8333	0.177512	0.161102	0.321867		0.178058	0.186289	0.212459		0.203713	0.220934	0.272959		0.266107		0.350932		0.353348	0.506404	0.476023
24	0.178365	0.161708	0.319058		0.177853	0.186392	0.211433		0.20008	0.219643	0.27154		0.265116		0.349758		0.35108	0.504378	0.473501
24.1667	0.177291	0.16135	0.318012		0.176416	0.1867	0.209483		0.201832	0.218064	0.270807		0.263706		0.347776		0.349531	0.502168	0.471845
24.3333	0.178035	0.161129	0.315753		0.175534	0.185714	0.209052		0.198678	0.216582	0.268973		0.262166		0.346407		0.34779	0.500419	0.470196
24.5	0.178282	0.160634	0.314486		0.176273	0.185509	0.206897		0.199681	0.21537	0.268447		0.260573		0.344468		0.346333	0.49855	0.468064
24.6667	0.176246	0.159614	0.312063		0.175287	0.184832	0.206137		0.200382	0.214318	0.26655		0.259432		0.343467		0.344613	0.496283	0.466686
24.8333	0.177236	0.159091	0.30873		0.175965	0.185099	0.203448		0.196925	0.213377	0.265513		0.258193		0.341689		0.34339	0.494506	0.46481
25	0.177814	0.15876	0.307629		0.173584	0.183477	0.204433		0.196351	0.210698	0.264621		0.25702		0.339976		0.341592	0.492857	0.463559
25.1667	0.176686	0.159972	0.3065		0.172845	0.184524	0.203038		0.194152	0.210061	0.26258		0.255566		0.338684		0.340064	0.491407	0.46174
25.3333	0.177374	0.161377	0.302616		0.172947	0.184339	0.202504		0.193435	0.210714	0.260651		0.25421		0.336529		0.338067	0.489303	0.460034
25.5	0.176576	0.160579	0.302616		0.173009	0.183395	0.200903		0.191029	0.209439	0.260045		0.252864		0.335506		0.337235	0.487363	0.458577
25.6667	0.176218	0.158815	0.296723		0.172804	0.182389	0.198871		0.196638	0.209598	0.259104		0.25168		0.333685		0.335622	0.486077	0.456403
25.8333	0.177264	0.158154	0.292592		0.173235	0.182923	0.198317		0.194168	0.207733	0.259518		0.249968		0.332791		0.334279	0.482871	0.455124
26	0.176741	0.156804	0.291765		0.170977	0.182984	0.196716		0.194614	0.206441	0.258099		0.24887		0.330938		0.332146	0.481912	0.453496
26.1667	0.176906	0.158402	0.291104		0.169869	0.183231	0.196305		0.195714	0.206186	0.256425		0.247825		0.329872		0.331301	0.48	0.451713
26.3333	0.176576	0.157741	0.29127		0.170259	0.181137	0.195443		0.194646	0.204879	0.255644		0.247007		0.328482		0.329069	0.478209	0.450121
26.5	0.177209	0.159008	0.292702		0.170731	0.182615	0.191133		0.192575	0.204783	0.254688		0.24593		0.327103		0.327598	0.476404	0.44838
26.6667	0.17608	0.156915	0.291132		0.169007	0.180952	0.192344		0.191507	0.203077	0.255006		0.2448		0.325164		0.32634	0.474542	0.446973
26.8333	0.177291	0.156777	0.28981		0.169499	0.181589	0.191482		0.190057	0.203555	0.252583		0.243852		0.324098		0.324655	0.473056	0.445708
27	0.176576	0.157603	0.28791		0.168514	0.181383	0.189019		0.190041	0.201116	0.252519		0.242571		0.322083		0.323305	0.471038	0.443832
27.1667	0.176906	0.156749	0.285541		0.169068	0.18124	0.188403		0.186233	0.200016	0.250829		0.241225		0.320888		0.32209	0.469822	0.442027
27.3333	0.177154	0.157218	0.284715		0.167549	0.181117	0.186658		0.178235	0.201052	0.250112		0.240342		0.319606		0.320583	0.467711	0.440485
27.5	0.178172	0.156915	0.284109		0.167057	0.180213	0.186166		0.178537	0.198262	0.249538		0.23947		0.317882		0.318984	0.465743	0.438914
27.6667	0.176548	0.156171	0.282787		0.1672	0.180419	0.185632		0.178521	0.197417	0.249123		0.23736		0.316891		0.316873	0.464058	0.437735
27.8333	0.176989	0.157658	0.280391		0.166359	0.180172	0.184565		0.178744	0.196429	0.248485		0.236865		0.315329		0.31619	0.46226	0.436164
28	0.176603	0.156529	0.280143		0.165086	0.180644	0.182902		0.177741	0.196221	0.246126		0.235939		0.313778		0.314826	0.460888	0.434409
28.1667	0.176741	0.156612	0.284467		0.166051	0.180706	0.183292		0.175574	0.196062	0.246795		0.234475		0.313078		0.313355	0.459261	0.433201
28.3333	0.177787	0.157466	0.279565		0.165476	0.180624	0.181917		0.176816	0.194324	0.244882		0.23287		0.311505		0.311819	0.457591	0.431971
28.5	0.176246	0.154187	0.276012		0.165148	0.179865	0.180275		0.175223	0.193989	0.245057		0.232321		0.310072		0.310718	0.455956	0.430387
28.6667	0.174677	0.155262	0.274773		0.165312	0.179782	0.179741		0.175765	0.193048	0.243064		0.231062		0.309501		0.308898	0.453895	0.428638
28.8333	0.176521	0.155427	0.277912		0.163998	0.179044	0.179023		0.17508	0.191789	0.24265		0.229587		0.308047		0.307619	0.452694	0.426784
29	0.177567	0.155868	0.273038		0.165168	0.179269	0.17814		0.175048	0.191693	0.242044		0.228618		0.306625		0.306112	0.451009	0.425711
29.1667	0.176879	0.156336	0.269513		0.163342	0.178756	0.17734		0.173646	0.190434	0.241327		0.227573		0.304826		0.305089	0.449602	0.42382
29.3333	0.178035	0.154105	0.26921		0.164183	0.178366	0.176129		0.173566	0.190753	0.240864		0.227099		0.303275		0.302985	0.447441	0.422975
29.5	0.177181	0.154848	0.268741		0.163239	0.178777	0.175144		0.172387	0.189477	0.239222		0.226001		0.302262		0.301898	0.445849	0.421227
29.6667	0.177484	0.154628	0.267364		0.164183	0.179269	0.175062		0.171192	0.189525	0.239493		0.225345		0.301842		0.300689	0.444627	0.419727
29.8333	0.176328	0.15427	0.263536		0.162644	0.178654	0.173481		0.171925	0.1886	0.238839		0.223988		0.300269		0.299701	0.442672	0.418611
30	0.177099	0.155262	0.265106		0.163424	0.178592	0.172947		0.172594	0.187643	0.237707		0.223374		0.29846		0.29828	0.44118	0.417183
30.1667	0.177236	0.155344	0.263399		0.162582	0.177196	0.172557		0.170427	0.187675	0.236001		0.222093		0.297091		0.296915	0.439638	0.415598
30.3333	0.176989	0.156749	0.262462		0.161741	0.177258	0.171757		0.168754	0.186958	0.235746		0.221361		0.296359		0.29624	0.438117	0.414042
30.5	0.177319	0.154793	0.2607		0.162151	0.177627	0.172147		0.169487	0.185603	0.235236		0.220403		0.295336		0.294726	0.436901	0.412784
30.6667	0.177044	0.154876	0.261553		0.160961	0.177443	0.171305		0.169981	0.185108	0.234104		0.219348		0.293267		0.293056	0.434833	0.411434
30.8333	0.177457	0.156088	0.259075		0.162315	0.17814	0.169068		0.168897	0.185045	0.233689		0.218971		0.292373		0.291933	0.433234	0.41029
31	0.176769	0.154435	0.258827		0.161823	0.176765	0.168432		0.169933	0.184917	0.232175		0.217323		0.291274		0.290896	0.431805	0.408492
31.1667	0.177429		0.255935		0.161474	0.177155	0.167652		0.171399	0.184407	0.232223		0.216947		0.289885		0.28973	0.430028	0.407156
31.3333	0.176576		0.254558		0.160468	0.176786	0.165764		0.168467	0.184072	0.231617		0.216075		0.288463		0.288607	0.428863	0.405863
31.5	0.177126		0.253594		0.159647	0.177853	0.166749		0.16963	0.183211	0.230596		0.214621		0.287375		0.286219	0.427136	0.404797
31.6667	0.177347		0.251887		0.159955	0.177401	0.165291		0.167941	0.18192	0.230405		0.214363		0.286707		0.285814	0.425387	0.403105
31.8333	0.176989		0.252272		0.158826	0.176129	0.163834		0.167224	0.182621	0.229273		0.213491		0.285597		0.284556	0.424286	0.40162
32	0.175778		0.252768		0.159339	0.175862	0.16367		0.16689	0.182876	0.229193		0.21278		0.284746		0.283447	0.422814	0.400661
32.1667	0.1782		0.250179		0.159544	0.175883	0.163177		0.167973	0.185443	0.228428		0.211553		0.28298		0.282871	0.420775	0.39914
32.3333	0.178558		0.248527		0.160037	0.175821	0.161864		0.165997	0.180134	0.228205		0.210874		0.282021		0.281215	0.419382	0.398373
32.5	0.17586		0.248995		0.158641	0.176601	0.160981		0.165201	0.179448	0.227982		0.210347		0.279813		0.280156	0.418181	0.396546
32.6667	0.177814		0.247205		0.158929	0.176149	0.160612		0.163926	0.179496	0.227487		0.209065		0.280028		0.27924	0.416681	0.395232
32.8333	0.177594		0.247893		0.159298	0.17539	0.159278		0.165583	0.178651	0.226244		0.20829		0.278466		0.278081	0.415195	0.39396
33	0.178337		0.247094		0.15858	0.175267	0.159667		0.162094	0.178571	0.22602		0.207192		0.278111		0.277043	0.413781	0.392723
33.1667	0.176658		0.244698		0.157902	0.175677	0.159298		0.163018	0.179129	0.225749		0.206158		0.27601		0.27597	0.412004	0.391337
33.3333	0.175998		0.244643		0.158723	0.175944	0.157861		0.163655	0.177408	0.224649		0.205986		0.275105		0.274641	0.410974	0.389909
33.5	0.176411		0.242991		0.158333	0.175267	0.156999		0.164356	0.177615	0.223852		0.205577		0.273662		0.273987	0.409758	0.389085
33.6667	0.177594		0.242165		0.158231	0.175021	0.157328		0.163894	0.177567	0.224155		0.204167		0.272778		0.272438	0.408308	0.387351
33.8333	0.182989		0.239769		0.158292	0.17539	0.156096		0.162221	0.176419	0.223469		0.203725		0.271733		0.271151	0.406674	0.385866
34	0.176631		0.238942		0.15821	0.173707	0.155193		0.161106	0.176403	0.222895		0.20239		0.27029		0.270327	0.405416	0.385048
34.1667	0.177457		0.238309		0.160858	0.174918	0.153961		0.161281	0.175702	0.222385		0.201723		0.269805		0.269303	0.403838	0.383286
34.3333	0.175778		0.240485		0.161084	0.174836	0.152997		0.160261	0.176036	0.221891		0.201593		0.268383		0.26806	0.40248	0.382618
34.5	0.175915		0.240044		0.157307	0.175328	0.153387		0.164181	0.175733	0.221811		0.200011		0.268394		0.267392	0.401059	0.380671
34.6667	0.177374		0.23696		0.157451	0.173748	0.15314		0.161552	0.176196	0.221604		0.199365		0.266498		0.266254	0.399488	0.379406
34.8333	0.176328		0.236299		0.158231	0.174466	0.151149		0.160628	0.175367	0.221827		0.198633		0.265431		0.265288	0.39833	0.378098
35	0.176383		0.234453		0.156589	0.173974	0.151211		0.15972	0.175	0.21985		0.198299		0.26429		0.264385	0.397015	0.377125
35.1667	0.176025		0.23371		0.157163	0.173563	0.151622		0.15999	0.175143	0.219691		0.197481		0.263772		0.263646	0.395721	0.376507
35.3333	0.176521		0.232801		0.156219	0.17383	0.150534		0.159114	0.173868	0.220233		0.196824		0.26234		0.262161	0.394662	0.374048
35.5	0.177236		0.231341		0.157328	0.173255	0.149651		0.158907	0.173549	0.220695		0.196027		0.261747		0.261166	0.392836	0.373273
35.6667	0.176741		0.233737		0.15743	0.173296	0.149302		0.159592	0.173485	0.21816		0.19536		0.260013		0.260178	0.391976	0.37242
35.8333	0.176934		0.231259		0.156404	0.173974	0.14844		0.159736	0.173772	0.217347		0.195058		0.25913		0.259602	0.390697	0.370786
36	0.176163		0.231506		0.156732	0.174076	0.14842		0.158668	0.172417	0.217538		0.19452		0.258451		0.25828	0.389055	0.369727
36.1667	0.177181		0.229193		0.156322	0.174158	0.147188		0.159066	0.173135	0.217044		0.193497		0.257363		0.257328	0.387555	0.368476
36.3333	0.176548		0.227761		0.156486	0.172824	0.14764		0.158349	0.173087	0.216757		0.192786		0.256286		0.256553	0.386532	0.367041
36.5	0.177264		0.229028		0.156835	0.17381	0.146059		0.159512	0.172688	0.215737		0.191333		0.255779		0.255437	0.385373	0.366401
36.6667	0.177319		0.227293		0.156383	0.172845	0.145156		0.158859	0.172401	0.215434		0.191311		0.255208		0.254193	0.384392	0.3652
36.8333	0.176493		0.225833		0.156219	0.173337	0.144787		0.158748	0.171381	0.215274		0.190698		0.253313		0.253099	0.38307	0.364092
37	0.177704		0.225392		0.156383	0.173686	0.145423		0.158238	0.171413	0.214732		0.190644		0.252171		0.252459	0.381684	0.363076
37.1667	0.176328		0.224346		0.156158	0.17342	0.14259		0.158971	0.171971	0.214222		0.189686		0.25146		0.251507	0.380306	0.361704
37.3333	0.177099		0.224676		0.156753	0.173625	0.144376		0.157425	0.171253	0.213776		0.188997		0.251373		0.251265	0.379453	0.360766
37.5	0.178007		0.223107		0.15704	0.173461	0.143658		0.159783	0.172433	0.213967		0.188932		0.249618		0.249815	0.377996	0.359444
37.6667	0.176411		0.224236		0.156342	0.173399	0.143144		0.1605	0.171189	0.212612		0.188146		0.249219		0.24865	0.37666	0.358528
37.8333	0.181118		0.22352		0.158888	0.173707	0.141995		0.158939	0.169691	0.212755		0.187877		0.247959		0.247839	0.375224	0.357156
38	0.183402		0.22374		0.157348	0.173009	0.141338		0.159831	0.170839	0.212261		0.186445		0.246644		0.247093	0.374136	0.356119
38.1667	0.175667		0.22374		0.156773	0.172332	0.1422		0.159815	0.169324	0.211384		0.18623		0.246009		0.246503	0.37322	0.355301
38.3333	0.176163		0.220876		0.156158	0.172763	0.13986		0.159146	0.169994	0.211464		0.185917		0.244899		0.246198	0.371365	0.354285
38.5	0.177374		0.219884		0.15587	0.172209	0.140066		0.160421	0.169579	0.210906		0.185476		0.244296		0.244563	0.370554	0.353105
38.6667	0.176934		0.219471		0.155932	0.172742	0.140538		0.160198	0.170631	0.211958		0.185024		0.243122		0.243426	0.369396	0.351869
38.8333	0.176383		0.218728		0.156979	0.171778	0.138526		0.160787	0.169834	0.212038		0.184464		0.243574		0.242658	0.368387	0.350895
39	0.177567		0.216993		0.157102	0.172763	0.137767		0.16399	0.169228	0.211001		0.183829		0.241808		0.24199	0.367676	0.349318
39.1667	0.176603		0.216414		0.156691	0.172065	0.138362		0.161297	0.169085	0.210603		0.183925		0.241183		0.240668	0.365785	0.348671
39.3333	0.176658		0.216056		0.156281	0.172291	0.137746		0.162572	0.168893	0.208769		0.18259		0.24072		0.2401	0.364335	0.348017
39.5	0.177209		0.214459		0.156404	0.17227	0.136043		0.16117	0.169021	0.208785		0.182203		0.238942		0.23919	0.363646	0.346546
39.6667	0.176273		0.212173		0.156342	0.172763	0.136556		0.158604	0.169404	0.209295		0.181977		0.23836		0.238742	0.362232	0.345466
39.8333	0.177429		0.213853		0.156342	0.173112	0.136494		0.158875	0.167953	0.208945		0.181309		0.237693		0.237385	0.361286	0.344621
40	0.176824		0.213963		0.157122	0.17188	0.135406		0.159688	0.169276	0.208594		0.180911		0.237456		0.236795	0.360455	0.343462
40.1667	0.177209		0.212669		0.15626	0.171285	0.135489		0.157744	0.167506	0.208147		0.180609		0.236842		0.235892	0.358806	0.342538
40.3333	0.182274		0.211429		0.156876	0.172434	0.135263		0.158238	0.166932	0.208084		0.180771		0.235667		0.235245	0.357591	0.341565
40.5	0.178971		0.210989		0.156958	0.171634	0.134298		0.153298	0.168208	0.207637		0.180093		0.233556		0.234371	0.356461	0.340037
40.6667	0.176796		0.210548		0.156732	0.17266	0.132553		0.152454	0.16883	0.208052		0.179662		0.23361		0.233397	0.355885	0.339078
40.8333	0.176906		0.210052		0.156199	0.172516	0.13319		0.156134	0.167682	0.207972		0.179113		0.233093		0.23285	0.354293	0.338445
41	0.17608		0.209557		0.157102	0.171695	0.134154		0.155019	0.167618	0.208115		0.179134		0.231358		0.231955	0.353426	0.337273
41.1667	0.175778		0.209199		0.156404	0.171962	0.132533		0.156421	0.16749	0.207956		0.178025		0.231305		0.231365	0.35199	0.33593
41.3333	0.175695		0.207381		0.157225	0.172044	0.132923		0.154573	0.166821	0.206617		0.178564		0.230087		0.230718	0.351244	0.334935
41.5	0.175227		0.207574		0.157697	0.171757	0.132328		0.153521	0.167857	0.206824		0.177789		0.229419		0.23	0.349765	0.334032
41.6667	0.175557		0.208124		0.15624	0.173871	0.13243		0.156628	0.166502	0.207239		0.177186		0.228913		0.229005	0.34877	0.332952
41.8333	0.175998		0.207711		0.15624	0.172824	0.131856		0.155736	0.167331	0.206712		0.176507		0.228159		0.228181	0.347804	0.332
42	0.174759		0.20694		0.156301	0.173707	0.132615		0.155465	0.167124	0.206744		0.17682		0.227222		0.227491	0.346724	0.330863
42.1667	0.175805		0.206086		0.15546	0.173502	0.131076		0.155386	0.166486	0.207143		0.176669		0.22664		0.227086	0.345736	0.329555
42.3333	0.177099		0.20705		0.155316	0.172742	0.129844		0.154828	0.166295	0.205708		0.177584		0.226317		0.226375	0.344286	0.328447
42.5	0.174456		0.203663		0.156178	0.172311	0.130501		0.156836	0.166661	0.207143		0.176335		0.224863		0.225345	0.343639	0.32824
42.6667	0.174952		0.204489		0.15587	0.172701	0.13046		0.156756	0.166741	0.205804		0.176152		0.225003		0.224762	0.342537	0.327409
42.8333	0.175805		0.203828		0.155747	0.173214	0.129044		0.155306	0.166183	0.205437		0.175291		0.223947		0.223753	0.341286	0.325789
43	0.176135		0.202809		0.155234	0.172393	0.12968		0.155386	0.167108	0.206059		0.175118		0.222794		0.223547	0.340299	0.324837
43.1667	0.174484		0.202341		0.154146	0.171429	0.128222		0.156628	0.166374	0.205644		0.174612		0.222073		0.224087	0.339453	0.323792
43.3333	0.17608		0.202038		0.154885	0.171449	0.128941		0.156166	0.166614	0.205708		0.174752		0.221997		0.222836	0.338259	0.322889
43.5	0.174869		0.201515		0.15509	0.172455	0.128961		0.15682	0.166135	0.205931		0.174645		0.220931		0.22135	0.336802	0.321902
43.6667	0.175723		0.200275		0.155747	0.172024	0.128058		0.155688	0.166725	0.205134		0.173783		0.220155		0.221166	0.336091	0.320907
43.8333	0.176301		0.200386		0.154249	0.172209	0.127443		0.157696	0.16824	0.204911		0.173902		0.219412		0.22005	0.334883	0.320068
44	0.174842		0.199504		0.153551	0.172393	0.127073		0.157011	0.166311	0.204528		0.173557		0.219336		0.219197	0.334222	0.318988
44.1667	0.175943		0.198926		0.154085	0.172229	0.126888		0.155561	0.166215	0.204815		0.173622		0.219423		0.21892	0.332985	0.3181
44.3333	0.175007		0.198485		0.153756	0.172906	0.127176		0.157505	0.166598	0.205006		0.172997		0.218378		0.218458	0.331947	0.317254
44.5	0.176328		0.198375		0.154208	0.17186	0.127525		0.156134	0.166119	0.205277		0.173105		0.217753		0.217257	0.330888	0.31606
44.6667	0.175888		0.198045		0.15429	0.172229	0.126888		0.156373	0.16639	0.205835		0.172631		0.217117		0.216183	0.330121	0.315158
44.8333	0.175062		0.198237		0.153448	0.173358	0.125349		0.156087	0.166374	0.20448		0.171748		0.216266		0.216347	0.328984	0.314618
45					0.153756	0.171531	0.126273		0.156899	0.165513	0.20354		0.172373		0.215792		0.215458	0.328195	0.31331
45.1667					0.153654	0.172332	0.126047		0.155386	0.166406	0.204161		0.172782		0.21562		0.214698	0.327129	0.312067
45.3333					0.154413	0.171736	0.125041		0.157138	0.165992	0.203651		0.173385		0.214338		0.214179	0.325856	0.311256
45.5					0.154454	0.172209	0.124918		0.155529	0.166215	0.204129		0.174139		0.212237		0.213383	0.325352	0.310453
45.6667					0.153489	0.171736	0.124979		0.156294	0.165816	0.203731		0.173148		0.212841		0.212964	0.324165	0.309366
45.8333					0.153859	0.171572	0.12381		0.157011	0.165673	0.203699		0.17289		0.212388		0.212061	0.323049	0.308428
46					0.154351	0.172291	0.124507		0.156644	0.166135	0.203827		0.172922		0.212076		0.211023	0.322203	0.307312
46.1667					0.154782	0.171388	0.125062		0.156039	0.166199	0.204672		0.172814		0.211494		0.211102	0.321485	0.307064
46.3333					0.155008	0.173112	0.124261		0.157712	0.165561	0.203906		0.17247		0.210869		0.209559	0.320327	0.305685
46.5					0.155275	0.171901	0.123666		0.160739	0.166502	0.20389		0.172179		0.210191		0.20936	0.319765	0.304704
46.6667					0.15507	0.171531	0.124384		0.159481	0.166199	0.204018		0.172093		0.209609		0.208955	0.318181	0.303816
46.8333					0.154516	0.172845	0.123851		0.156644	0.166438	0.204129		0.171878		0.208887		0.207768	0.317257	0.302587
47					0.153448	0.172845	0.12342		0.163066	0.166598	0.203157		0.171792		0.208316		0.207413	0.316482	0.301386
47.1667					0.153612	0.17108	0.122701		0.162205	0.166582	0.204098		0.171361		0.208015		0.207193	0.315537	0.300576
47.3333					0.154495	0.170259	0.122106		0.163607	0.166486	0.20346		0.171253		0.207799		0.206148	0.314335	0.299872
47.5					0.154392	0.172681	0.122824		0.163815	0.166502	0.202774		0.171932		0.207465		0.205537	0.314826	0.298486
47.6667					0.153428	0.171634	0.122763		0.166699	0.165784	0.20338		0.171286		0.206905		0.20489	0.313355	0.297577
47.8333					0.15392	0.17188	0.122188		0.163878	0.166087	0.203555		0.171232		0.205602		0.204072	0.312651	0.297122
48					0.153715	0.171429	0.122947		0.160373	0.165753	0.203428		0.170941		0.205052		0.204072	0.311471	0.295679
48.1667					0.153941	0.171018	0.12186		0.158684	0.166789	0.20354		0.170963		0.204664		0.202871	0.310362	0.295153
48.3333					0.15548	0.170443	0.121039		0.160214	0.165705	0.204098		0.170984		0.2046		0.202395	0.309751	0.294635
48.5					0.158169	0.170792	0.12227		0.162014	0.1658	0.203237		0.171242		0.202833		0.201692	0.308806	0.293896
48.6667					0.154044	0.171572	0.120915		0.159847	0.166534	0.203221		0.170553		0.202822		0.201642	0.308145	0.292744
48.8333					0.152771	0.171962	0.121449		0.160166	0.166295	0.202679		0.170403		0.202715		0.200817	0.307186	0.291799
49					0.154064	0.172065	0.120998		0.158795	0.166406	0.203619		0.170317		0.202488		0.200611	0.305899	0.291195
49.1667					0.154023	0.170874	0.12147		0.158636	0.165848	0.202631		0.170381		0.202348		0.19973	0.304719	0.291508
49.3333					0.153366	0.171449	0.120402		0.156597	0.164668	0.203029		0.170467		0.201336		0.198763	0.304208	0.289767
49.5					0.154947	0.171839	0.119212		0.157377	0.165577	0.201818		0.170424		0.201594		0.198081	0.303092	0.288943
49.6667					0.153674	0.172147	0.119828		0.159481	0.164971	0.201419		0.170209		0.200334		0.198223	0.302438	0.287749
49.8333					0.154475	0.171983	0.120587		0.157361	0.166008	0.202822		0.170177		0.200022		0.197129	0.301393	0.286782
50					0.156363	0.171223	0.120751		0.15666	0.166071	0.202121		0.170134		0.199591		0.196887	0.29951	0.286526
50.1667					0.154516	0.171203	0.119643		0.15666	0.165912	0.202264		0.170457		0.1993		0.196205	0.299183	0.285425
50.3333					0.153961	0.171388	0.11954		0.155736	0.166215	0.202774		0.169746		0.199343		0.195608	0.298564	0.284984
50.5					0.154639	0.171634	0.120341		0.155752	0.165561	0.203029		0.170134		0.198998		0.195117	0.297683	0.283727
50.6667					0.15392	0.171059	0.119561		0.156485	0.165928	0.203109		0.169929		0.198169		0.194691	0.296759	0.283293
50.8333					0.152956	0.172188	0.118617		0.156278	0.164812	0.202918		0.170284		0.197705		0.193824	0.295721	0.282206
51					0.153695	0.170628	0.11913		0.155816	0.164732	0.202679		0.169681		0.197318		0.193625	0.294854	0.281723
51.1667					0.153777	0.172065	0.1203		0.156804	0.165179	0.202695		0.169391		0.197393		0.19295	0.294328	0.281346
51.3333					0.153797	0.171305	0.119684		0.156039	0.165195	0.202774		0.169488		0.196477		0.192729	0.293575	0.279761
51.5					0.154721	0.171203	0.118001		0.156214	0.165832	0.202455		0.169444		0.195874		0.191997	0.29231	0.279456
51.6667					0.153571	0.171244	0.11798		0.156708	0.166167	0.202376		0.169671		0.1954		0.191421	0.291628	0.278546
51.8333					0.154495	0.171305	0.118411		0.156947	0.165402	0.201786		0.169811		0.195282		0.190668	0.290377	0.27775
52					0.153961	0.171367	0.119417		0.155991	0.164796	0.201818		0.169811		0.194151		0.190114	0.289687	0.276976
52.1667					0.153592	0.170382	0.119253		0.156342	0.165513	0.203045		0.16966		0.194635		0.189723	0.288685	0.276286
52.3333					0.15392	0.170977	0.119889		0.156134	0.165418	0.203189		0.169014		0.193364		0.189908	0.288003	0.275796
52.5					0.153387	0.17071	0.119253		0.156485	0.166167	0.20295		0.170241		0.193924		0.189225	0.287342	0.274758
52.6667					0.152545	0.17071	0.118411		0.156166	0.165418	0.203157		0.169068		0.193978		0.188181	0.286354	0.274538
52.8333					0.154085	0.170628	0.119848		0.155672	0.165306	0.202471		0.170209		0.192761		0.187832	0.2857	0.273536
53					0.153551	0.16991	0.119294		0.156437	0.165083	0.202423		0.169143		0.192761		0.187086	0.285267	0.27274
53.1667					0.153982	0.170649	0.117693		0.156262	0.16521	0.203189		0.169423		0.191802		0.187271	0.283973	0.272925
53.3333					0.15312	0.170792	0.118288		0.156358	0.165529	0.202806		0.168788		0.191425		0.18661	0.283383	0.27144
53.5					0.153222	0.170115	0.11837		0.15537	0.165466	0.202264		0.169132		0.191339		0.18607	0.282246	0.270729
53.6667					0.153469	0.170731	0.118637		0.155513	0.165705	0.202982		0.168475		0.190542		0.1857	0.28172	0.269507
53.8333					0.152586	0.17108	0.119499		0.156182	0.165083	0.203109		0.168519		0.190359		0.185274	0.280839	0.268775
54					0.153038	0.170956	0.119048		0.155545	0.164971	0.203029		0.168637		0.190025		0.185032	0.280007	0.267702
54.1667					0.153428	0.170998	0.118514		0.155848	0.166103	0.202423		0.168885		0.189572		0.184129	0.279367	0.267524
54.3333					0.152894	0.170936	0.118801		0.155577	0.165306	0.202408		0.168594		0.188948		0.183952	0.278714	0.266977
54.5					0.153181	0.170443	0.119232		0.156182	0.165083	0.202105		0.167819		0.18856		0.183085	0.278003	0.265812
54.6667					0.153674	0.170443	0.117529		0.155433	0.16596	0.202025		0.168465		0.188334		0.182409	0.2772	0.265222
54.8333					0.15351	0.171244	0.117734		0.15521	0.165577	0.202631		0.168185		0.187978		0.182416	0.276091	0.264262
55					0.153448	0.170628	0.118637		0.156517	0.165147	0.202121		0.168346		0.187547		0.181962	0.275274	0.264049
55.1667					0.15351	0.170402	0.118288		0.15725	0.165497	0.202121		0.167743		0.187353		0.181031	0.274634	0.26314
55.3333					0.152545	0.170833	0.118083		0.1558	0.165689	0.202264		0.168389		0.186201		0.181265	0.273753	0.262621
55.5					0.152935	0.170587	0.118247		0.155178	0.164302	0.201132		0.168206		0.186502		0.180419	0.273319	0.261661
55.6667					0.153407	0.172065	0.117344		0.155163	0.164621	0.20177		0.168303		0.185565		0.17946	0.272239	0.260588
55.8333					0.152874	0.171552	0.117488		0.154892	0.166055	0.201881						0.179311	0.271649	0.260432
56					0.153058	0.170505	0.11796		0.15521	0.165482	0.202264						0.17936	0.270803	0.25965
56.1667					0.152627	0.170587	0.116646		0.155959	0.16521	0.202184						0.179389	0.269964	0.258954
56.3333					0.153818	0.171141	0.117365		0.15529	0.1658	0.201722						0.178863	0.269325	0.258329
56.5					0.153038	0.169191	0.117652		0.155625	0.168048	0.201674						0.178337	0.26877	0.257774
56.6667					0.152833	0.171572	0.117406		0.156119	0.168575	0.202312						0.1786	0.268145	0.256794
56.8333					0.15314	0.17032	0.117118		0.159401	0.164493	0.202312						0.177434	0.267242	0.256552
57					0.152381	0.170546	0.117816		0.155513	0.164429	0.202455						0.1771	0.266624	0.255237
57.1667					0.153407	0.170423	0.117323		0.155641	0.164334	0.201945						0.176823	0.266006	0.254711
57.3333					0.152894	0.171244	0.1164		0.155083	0.164349	0.201929						0.176681	0.26543	0.254306
57.5					0.15312	0.170423	0.117631		0.156007	0.164318	0.202025						0.176375	0.264463	0.253816
57.6667					0.152689	0.176108	0.117098		0.155194	0.164939	0.202631						0.175402	0.263923	0.25312
57.8333					0.152771	0.173173	0.116564		0.156119	0.1647	0.201658						0.17565	0.262992	0.252345
58					0.152196	0.169663	0.117365		0.155099	0.164493	0.201355						0.174819	0.262843	0.251066
58.1667					0.153346	0.170279	0.117816		0.155067	0.164429	0.201148						0.174385	0.261578	0.25113
58.3333					0.153222	0.170792	0.117631		0.154669	0.163504	0.201802						0.174023	0.261386	0.250291
58.5					0.151745	0.170074	0.117898		0.155163	0.164621	0.201355						0.17376	0.260476	0.249233
58.6667					0.152176	0.170115	0.117549		0.154653	0.164684	0.201594						0.173689	0.259844	0.248835
58.8333					0.151375	0.170505	0.117385		0.154892	0.163648	0.202184						0.173141	0.259268	0.247292
59					0.152976	0.170156	0.116995		0.155481	0.16478	0.201658						0.173319	0.258351	0.246823
59.1667					0.153448	0.170094	0.116626		0.155194	0.164445	0.201483						0.172651	0.25806	0.246511
59.3333					0.151827	0.170772	0.116154		0.154653	0.163074	0.200925						0.172843	0.257001	0.246234
59.5					0.153079	0.169889	0.116585		0.154398	0.163616	0.201849						0.172324	0.256667	0.245168
59.6667					0.152422	0.169848	0.1172		0.155274	0.163233	0.201993						0.171834	0.255821	0.244471
59.8333					0.151929	0.169704	0.117323		0.154573	0.164429	0.201339						0.171365	0.255131	0.243597
60					0.152278	0.168801	0.117303		0.154222	0.163457	0.201435						0.171642	0.254932	0.243228
60.1667					0.152709	0.169191	0.115764		0.15435	0.164238	0.20051						0.17123	0.254208	0.242574
60.3333					0.152874	0.170361	0.11835		0.153936	0.164174	0.201483						0.170505	0.253284	0.242332
60.5					0.152401	0.170361	0.1172		0.154254	0.163504	0.200781						0.170348	0.252807	0.241202
60.6667					0.152853	0.170751	0.116995		0.154366	0.163409	0.2011						0.170128	0.252353	0.240627
60.8333					0.151909	0.170402	0.116605		0.154143	0.163233	0.200989						0.169517	0.251535	0.240321
61					0.151745	0.171244	0.116461		0.154398	0.163552	0.201563						0.169261	0.251521	0.239937
61.1667					0.152894	0.170731	0.116277		0.155147	0.163058	0.200733						0.169694	0.250782	0.239262
61.3333					0.152976	0.17032	0.116544		0.154876	0.163983	0.201467						0.168721	0.250341	0.238928
61.5					0.151929	0.169294	0.116667		0.154175	0.163776	0.200717						0.168834	0.25	0.23799
61.6667					0.152853	0.17069	0.117488		0.154414	0.162915	0.201531						0.168422	0.249026	0.237656
61.8333					0.152545	0.170012	0.117057		0.153728	0.163297	0.200175						0.168181	0.248842	0.236967
62					0.153551	0.170525	0.116933		0.15435	0.16309	0.200191						0.16801	0.248102	0.236498
62.1667					0.152874	0.170936	0.115805		0.154111	0.162946	0.199777						0.167512	0.247356	0.236896
62.3333					0.153222	0.169848	0.116236		0.154127	0.162962	0.201116						0.167505	0.247157	0.23534
62.5					0.153305	0.171141	0.117365		0.154398	0.163504	0.200733						0.167022	0.246297	0.234977
62.6667					0.152689	0.169992	0.116605		0.153952	0.162946	0.2						0.16693	0.245537	0.234437
62.8333					0.152504	0.170546	0.118165		0.154127	0.162867	0.200702						0.166745	0.245046	0.234053
63					0.153551	0.169438	0.11642		0.15392	0.164222	0.200399						0.166276	0.244257	0.232952
63.1667					0.154002	0.170197	0.116174		0.153426	0.1636	0.200478						0.166254	0.243738	0.23259
63.3333					0.153715	0.169704	0.116605		0.153665	0.162691	0.199107						0.16592	0.243006	0.23217
63.5					0.152915	0.169622	0.1164		0.153235	0.163871	0.200622						0.165437	0.242793	0.231318
63.6667					0.153058	0.170792	0.116708		0.154222	0.162484	0.200829						0.165928	0.241706	0.230664
63.8333					0.154023	0.170074	0.116585		0.154573	0.162771	0.20059						0.165124	0.241414	0.230479
64					0.153161	0.168904	0.116667		0.153107	0.161814	0.2						0.165124	0.241137	0.229953
64.1667					0.153859	0.169458	0.116564		0.153681	0.163504	0.200462						0.16543	0.240185	0.229299
64.3333					0.151642	0.169499	0.115599		0.153633	0.163217	0.199952						0.165274	0.239972	0.228674
64.5					0.153017	0.168822	0.121901		0.153808	0.163377	0.200877						0.164463	0.239055	0.22856
64.6667					0.153058	0.169499	0.11757		0.153043	0.162293	0.200143						0.164634	0.238792	0.22748
64.8333					0.153305	0.170649	0.116482		0.153442	0.162978	0.2						0.163973	0.238557	0.227231
65					0.153428	0.169438	0.115969		0.153792	0.162962	0.20067						0.16366	0.237541	0.226258
65.1667					0.152956	0.169869	0.116133		0.153681	0.163122	0.200367						0.163774	0.237242	0.22603
65.3333					0.154331	0.170382	0.116585		0.153967	0.164126	0.200733						0.163603	0.236006	0.225384
65.5					0.153305	0.169273	0.116051		0.153171	0.163425	0.200207						0.163689	0.236112	0.224794
65.6667					0.153305	0.170259	0.117098		0.152725	0.163552	0.200175						0.163383	0.235743	0.224559
65.8333					0.152956	0.170567	0.116646		0.152964	0.162978	0.201961						0.162822	0.234421	0.223827
66					0.152422	0.170156	0.116728		0.153426	0.163377	0.200223						0.163276	0.233319	0.223728
66.1667					0.152525	0.169438	0.11601		0.153235	0.163377	0.199554						0.162992	0.232793	0.223131
66.3333					0.15351	0.171018	0.115846		0.153521	0.164158	0.200207						0.163035	0.232232	0.222214
66.5					0.152956	0.170505	0.115887		0.153314	0.16124	0.199936						0.162964	0.231784	0.221532
66.6667					0.152463	0.170135	0.115866		0.153458	0.163138	0.199298						0.162161	0.2315	0.220971
66.8333					0.152484	0.17071	0.115722		0.154509	0.162707	0.199825						0.163973	0.230434	0.22085
67					0.15234	0.170402	0.116071		0.154015	0.162723	0.199617						0.164087	0.230455	0.219976
67.1667					0.153346	0.170279	0.116626		0.153808	0.163457	0.200399						0.162445	0.229716	0.219457
67.3333					0.151745	0.171429	0.116359		0.154796	0.162787	0.200048						0.161841	0.229154	0.218924
67.5					0.151765	0.169828	0.116277		0.153585	0.162707	0.199522						0.161955	0.228543	0.218619
67.6667					0.151888	0.169807	0.116523		0.153442	0.162915	0.199554						0.161699	0.228102	0.218292
67.8333					0.152545	0.169335	0.116482		0.153346	0.164971	0.199888						0.162353	0.227463	0.217936
68					0.150965	0.16993	0.115681		0.154047	0.162564	0.199777						0.160874	0.227541	0.217119
68.1667					0.152381	0.169848	0.115784		0.153776	0.163122	0.199888						0.160896	0.226688	0.2166
68.3333									0.154111	0.163106	0.199649						0.161187	0.226112	0.216472
68.5									0.154716	0.161783	0.19933						0.160924	0.226048	0.216003
68.6667									0.158062	0.162149	0.200223						0.160498	0.22538	0.215243
68.8333									0.154955	0.162899	0.200303						0.160547	0.224805	0.214845
69									0.154159	0.163776	0.199346						0.159922	0.224634	0.214376
69.1667									0.153235	0.163186	0.199984						0.159922	0.224115	0.213744
69.3333									0.154047	0.163106	0.199952						0.160291	0.223717	0.213573
69.5									0.154764	0.16293	0.199872						0.159957	0.222679	0.212678
69.6667									0.154414	0.163154	0.200128						0.159879	0.222345	0.212344
69.8333																	0.15941	0.222011	0.211818
70																	0.159524	0.221912	0.211256
70.1667																	0.159502	0.221471	0.211121
70.3333																	0.159126	0.220952	0.210596
70.5																	0.159645	0.220355	0.210041
70.6667																	0.158884	0.219972	0.209856
70.8333																	0.159069	0.219531	0.208918
71																	0.158721	0.219005	0.208549
71.1667																	0.158507	0.21892	0.208044
71.3333																	0.158493	0.218472	0.207213
71.5																	0.158714	0.217783	0.207042
71.6667																	0.158671	0.217377	0.206389
71.8333																	0.158394	0.217093	0.206133
72																	0.158436	0.216468	0.205678
72.1667																	0.157733	0.216176	0.205209
72.3333																	0.157669	0.215856	0.204761
72.5																	0.157839	0.215082	0.20425
72.6667																	0.157534	0.215231	0.204157
72.8333																	0.15823	0.214414	0.206737
73																	0.158031	0.214023	0.206424
73.1667																	0.157669	0.213596	0.205856
73.3333																	0.157512	0.21317	0.205657
73.5																	0.157249	0.213234	0.205266
73.6667																	0.157107	0.212246	0.204811
73.8333																	0.157157	0.212132	0.203852
74																	0.156944	0.211642	0.203901
74.1667																	0.156724	0.210561	0.203276
74.3333																	0.15661	0.210448	0.20312
74.5																	0.156525	0.210441	0.202281
74.6667																	0.156631	0.210085	0.201954
74.8333																	0.156709	0.210256	0.201649
75																	0.156055	0.209851	0.200966
75.1667																	0.156453	0.209104	0.200831
75.3333																	0.156553	0.209083	0.200092
75.5																	0.156276	0.209048	0.199765
75.6667																	0.155928	0.208287	0.199247
75.8333																	0.156148	0.207569	0.198863
76																	0.156169	0.207413	0.198373
76.1667																	0.155835	0.2072	0.197726
76.3333																	0.155899	0.20661	0.197328
76.5																	0.155864	0.206489	0.196589
76.6667																	0.155672	0.206048	0.196298
76.8333																	0.155736	0.205906	0.19607
77																	0.155686	0.205572	0.195594
77.1667																	0.155771	0.205458	0.195082
77.3333																	0.155352	0.204819	0.194663
77.5																	0.155245	0.20467	0.194116
77.6667																	0.155416	0.204115	0.19408
77.8333																	0.155359	0.204009	0.193903
78																	0.155565	0.203703	0.192744
78.1667																	0.155146	0.203127	0.192446
78.3333																	0.15533	0.202758	0.192361
78.5																	0.155366	0.202772	0.1916
78.6667																	0.155053	0.202324	0.191082
78.8333																	0.154911	0.202274	0.190939
79																	0.155323	0.201564	0.190392
79.1667																	0.155124	0.201265	0.190229
79.3333																	0.155316	0.201045	0.189476
79.5																	0.155267	0.200689	0.189184
79.6667																	0.154414	0.20054	0.188971
79.8333																	0.154442	0.200725	0.188189
80																	0.153561	0.199922	0.188381
80.1667																	0.154136	0.199936	0.187429
80.3333																	0.155039	0.199502	0.186981
80.5																	0.154911	0.199083	0.186669
80.6667																	0.154911	0.198756	0.186462
80.8333																	0.15506	0.198898	0.186114
81																	0.155075	0.198827	0.185993
81.1667																	0.154271	0.198316	0.185254
81.3333																	0.154485	0.19796	0.185084
81.5																	0.154762	0.197129	0.184409
81.6667																	0.154534	0.197385	0.184082
81.8333																	0.154641	0.1972	0.183798
82																	0.154819	0.197214	0.183478
82.1667																	0.154385	0.196795	0.18308
82.3333																	0.154371	0.196645	0.182668
82.5																	0.154286	0.19597	0.182092
82.6667																	0.15462	0.195984	0.181843
82.8333																	0.154222	0.195579	0.181737
83																	0.154542	0.19543	0.180827
83.1667																	0.1543	0.195082	0.180387
83.3333																	0.154471	0.194826	0.180394
83.5																	0.154471	0.194712	0.180017
83.6667																	0.154556	0.194471	0.179505
83.8333																	0.154542	0.194136	0.179207
84																	0.154812	0.193774	0.178745
84.1667																	0.154385	0.193802	0.178653
84.3333																	0.154335	0.193674	0.178454
84.5																	0.154385	0.193412	0.178141
84.6667																	0.153881	0.193348	0.177651
84.8333																	0.154229	0.193099	0.177132
85																	0.154293	0.192701	0.177018
85.1667																	0.153653	0.19295	0.177018
85.3333																	0.154222	0.19231	0.176364
85.5																	0.153724	0.192175	0.176151
85.6667																	0.15398	0.192111	0.176173
85.8333																	0.153824	0.191734	0.175604
86																	0.154513	0.191471	0.175235
86.1667																	0.153475	0.191407	0.175085
86.3333																	0.154044	0.190732	0.174666
86.5																	0.15408	0.190213	0.174488
86.6667																	0.15398	0.190014	0.174126
86.8333																	0.15376	0.189638	0.174012
87																	0.153639	0.18968	0.173735
87.1667																	0.153674	0.189346	0.173614
87.3333																	0.154186	0.189019	0.173167
87.5																	0.153653	0.189062	0.172577
87.6667																	0.153831	0.188898	0.172598
87.8333																	0.153746	0.188564	0.1723
88																	0.153255	0.188216	0.171973
88.1667																	0.153703	0.18796	0.171617
88.3333																	0.153461	0.187704	0.171141
88.5																	0.153611	0.187512	0.171084
88.6667																	0.153689	0.187903	0.170665
88.8333																	0.15344	0.18737	0.170111
89																	0.153746	0.187299	0.170402
89.1667																	0.153611	0.186986	0.169699
89.3333																	0.153611	0.186468	0.169564
89.5																	0.153255	0.186581	0.169443
89.6667																	0.153596	0.186638	0.169116
89.8333																	0.153575	0.186311	0.169073
90																	0.153113	0.185743	0.168412
90.1667																	0.153724	0.185601	0.168121
90.3333																	0.153596	0.185458	0.167887
90.5																	0.153319	0.185338	0.167474
90.6667																	0.154584	0.185117	0.167254
90.8333																	0.154058	0.184826	0.167638
91																	0.153326	0.184748	0.166508
91.1667																	0.153667	0.184591	0.166565
91.3333																	0.153674	0.184208	0.166615
91.5																	0.153269	0.184222	0.165982
91.6667																	0.153099	0.184179	0.165918
91.8333																	0.15366	0.183696	0.165563
92																	0.152814	0.183568	0.165598
92.1667																	0.153298	0.183369	0.165499
92.3333																	0.153724	0.183134	0.164959
92.5																	0.153362	0.182871	0.165016
92.6667																	0.153305	0.183049	0.164575
92.8333																	0.153262	0.182438	0.164348
93																	0.15322	0.18209	0.163502
93.1667																	0.153099	0.182118	0.163843
93.3333																	0.15322	0.18194	0.16326
93.5																	0.153077	0.181521	0.163019
93.6667																	0.152893	0.181741	0.163175
93.8333																		0.18113	0.162571
94																		0.181187	0.161967
94.1667																		0.181137	0.162301
94.3333																		0.180853	0.162088
94.5																		0.180732	0.161647
94.6667																		0.180476	0.16159
94.8333																		0.18027	0.161647
95																		0.179915	0.160809
95.1667																		0.18032	0.160745
95.3333																		0.179908	0.159544
95.5																		0.179467	0.158336
95.6667																		0.179325	0.158002
95.8333																		0.178991	0.157852
96																		0.179524	0.157653
96.1667																		0.178635	0.157639
96.3333																		0.178749	0.157092
96.5																		0.178571	0.157042
96.6667																		0.178543	0.156751
96.8333																		0.178081	0.156737
97																		0.178159	0.15646
97.1667																		0.177989	0.156403
97.3333																		0.177918	0.156332
97.5																		0.177271	0.155877
97.6667																		0.177328	0.155458
97.8333																		0.177072	0.1555
98																		0.176674	0.155024
98.1667																		0.176908	0.15523
98.3333																		0.176333	0.154498
98.5																		0.175501	0.154669
98.6667																		0.175551	0.154292
98.8333																		0.176006	0.154058
99																		0.176041	0.154221
99.1667																		0.175828	0.153795
99.3333																		0.175416	0.153709
99.5																		0.175615	0.153347
99.6667																		0.175387	0.153226
99.8333																		0.17489	0.153297
100																		0.175039	0.152601
100.167																		0.174662	0.152835
100.333																		0.174549	0.15231
100.5																		0.174442	0.152793
100.667																		0.174982	0.152231
100.833																		0.174179	0.151762
101																		0.174279	0.151599
101.167																		0.174364	0.151386
101.333																		0.174051	0.151379
101.5																		0.173767	0.15103
101.667																		0.173383	0.151194
101.833																		0.173497	0.15076
102																		0.173738	0.150704
102.167																		0.173532	0.150469
102.333																		0.173099	0.150178
102.5																		0.172736	0.150348
102.667																		0.173085	0.150007
102.833																		0.172701	0.149964
103																		0.172914	0.149638
103.167																		0.172615	0.149574
103.333																		0.172509	0.149254
103.5																		0.172708	0.148827
103.667																		0.172281	0.148984
103.833																		0.172104	0.148792
104																		0.172416	0.148628
104.167																		0.171933	0.149652
104.333																		0.171649	0.14833
104.5																		0.171748	0.148231
104.667																		0.171592	0.14833
104.833																		0.171557	0.148202
105																		0.171578	0.148032
105.167																		0.171784	0.147641
105.333																		0.171407	0.147499
105.5																		0.171485	0.14742
105.667																		0.170668	0.147449
105.833																		0.170931	0.147435
106																		0.171144	0.14693
106.167																		0.171087	0.146752
106.333																		0.171031	0.146646
106.5																		0.17081	0.146539
106.667																		0.17059	0.146525
106.833																		0.170561	0.146191
107																		0.17091	0.14612
107.167																		0.170569	0.14698
107.333																		0.170768	0.144976
107.5																		0.170078	0.145395
107.667																		0.170213	0.145203
107.833																		0.170398	0.14521
108																		0.170213	0.145111
108.167																		0.170213	0.144955
108.333																		0.170149	0.144791
108.5																		0.170171	0.144763
108.667																		0.17027	0.144677
108.833																		0.17	0.144841
109																		0.169808	0.144471
109.167																		0.16973	0.144478
109.333																		0.170021	0.144457
109.5																		0.169716	0.144215
109.667																		0.169808	0.144365
109.833																		0.169417	0.144258
110																		0.169325	0.144123
110.167																		0.169183	0.143754
110.333																		0.169119	0.143711
110.5																		0.169446	0.143789
110.667																		0.169751	0.144059
110.833																		0.169154	0.143825
111																	0.152893	0.168714	0.143846

## Sheet: equation
	repeat	E1	A1	K1	t1	R1	R1^2	E2	A2	K2	t2	R2	R2^2				E1	0.267721	0.0166923		0.267721	0.0166923	0.690551	0.030931	4.9507	2.36901	0.16043	0.00881279	0.187476	0.00898166	8.32455	3.70147	0.998646	0.998614
0.016	1	0.235215	0.751821	0.487545	2.05109	0.999983	0.999966	0.177309	0.169992	0.332845	3.0044	0.998971	0.997944				A1	0.690551	0.030931		0.273308	0.0183935	0.697188	0.0214404	4.76846	0.826714	0.144634	0.0181892	0.202917	0.0180217	8.71684	1.96644	0.9986	0.999278
0.016	2	0.277383	0.652522	0.31692	3.15537	0.999859	0.999717	0.147595	0.199787	0.153221	6.52652	0.999627	0.999255				K1	0.302713	0.111041		0.28463	0.0217453	0.692058	0.0219808	5.91563	0.483054	0.170931	0.0136703	0.182519	0.0128829	9.19601	0.430572	0.998281	0.996749
0.016	3	0.290564	0.66731	0.103674	9.64564	0.998126	0.996256	0.156386	0.19265	0.0647554	15.4427	0.999321	0.998642				t1	4.9507	2.36901		0.288623	0.00576	0.677923	0.00343533	8.57983	1.37022	0.149691	0.00542267	0.201305	0.00538433	15.2825	2.78045	0.997847	0.998318
0.021	1	0.236553	0.731547	0.18899	5.29128	0.999753	0.999506	0.15292	0.194476	0.143177	6.98438	0.999847	0.999694				R1	0.999323	0.000599301		0.284648	0.0275451	0.669601	0.0403319	16.7832	4.07622	0.134365	0.0133516	0.217803	0.0120186	27.6565	5.2089	0.995045	0.999122
0.021	2	0.293022	0.702227	0.3176	3.14861	0.999846	0.999691	0.171167	0.176791	0.153248	6.52537	0.999565	0.99913				R1^2	0.998646	0.00119744
0.021	3	0.290348	0.65779	0.170489	5.86549	0.9983	0.996602	0.109814	0.237484	0.079109	12.6408	0.999504	0.999009				E2	0.16043	0.00881279
0.027	1	0.278258	0.706305	0.194627	5.13804	0.999224	0.998448	0.153123	0.197398	0.113697	8.79532	0.997332	0.994672				A2	0.187476	0.00898166
0.027	2	0.250558	0.720951	0.147038	6.80095	0.99986	0.99972	0.161868	0.193296	0.114466	8.73624	0.998994	0.997988				K2	0.183607	0.0788681
0.027	3	0.325073	0.648917	0.172179	5.8079	0.998337	0.996676	0.197801	0.156862	0.0994384	10.0565	0.998792	0.997586				t2	8.32455	3.70147
0.04	1	0.294383	0.674488	0.138704	7.20961	0.998706	0.997415	0.155114	0.195921	0.0799867	12.5021	0.9988	0.997602				R2	0.999306	0.000189446
0.04	2	0.294383	0.674488	0.138704	7.20961	0.998706	0.997415	0.155114	0.195921	0.0799867	12.5021	0.9988	0.997602				R2^2	0.998614	0.000378625
0.04	3	0.277103	0.684794	0.0883372	11.3203	0.999356	0.998713	0.138846	0.212074	0.0479768	20.8434	0.999875	0.999751
0.061	1	0.326574	0.62289	0.108653	9.20358	0.995871	0.991759	0.14366	0.210818	0.0533575	18.7415	0.998958	0.997917				E1	0.273308	0.0183935
0.061	2	0.232736	0.749909	0.0431541	23.1728	0.999589	0.999179	0.151397	0.201377	0.0364351	27.446	0.999843	0.999687				A1	0.697188	0.0214404
0.061	3	0.294635	0.636005	0.0556384	17.9732	0.997094	0.994195	0.108038	0.241214	0.0271872	36.782	0.999881	0.999762				K1	0.225693	0.0462628
																	t1	4.76846	0.826714
																	R1	0.999299	0.00050056
																	R1^2	0.9986	0.00100017
																	E2	0.144634	0.0181892
																	A2	0.202917	0.0180217
																	K2	0.125178	0.0232172
																	t2	8.71684	1.96644
																	R2	0.999639	0.000105576
																	R2^2	0.999278	0.000211085
																	E1	0.28463	0.0217453
																	A1	0.692058	0.0219808
																	K1	0.171281	0.0137451
																	t1	5.91563	0.483054
																	R1	0.99914	0.000441643
																	R1^2	0.998281	0.000882472
																	E2	0.170931	0.0136703
																	A2	0.182519	0.0128829
																	K2	0.1092	0.00488621
																	t2	9.19601	0.430572
																	R2	0.998373	0.000523435
																	R2^2	0.996749	0.00104491
																	E1	0.288623	0.00576
																	A1	0.677923	0.00343533
																	K1	0.121915	0.016789
																	t1	8.57983	1.37022
																	R1	0.998923	0.00021665
																	R1^2	0.997847	0.00043288
																	E2	0.149691	0.00542267
																	A2	0.201305	0.00538433
																	K2	0.069317	0.01067
																	t2	15.2825	2.78045
																	R2	0.999159	0.0003583
																	R2^2	0.998318	0.000716126
																	E1	0.284648	0.0275451
																	A1	0.669601	0.0403319
																	K1	0.0691483	0.0200784
																	t1	16.7832	4.07622
																	R1	0.997518	0.00109411
																	R1^2	0.995045	0.00218345
																	E2	0.134365	0.0133516
																	A2	0.217803	0.0120186
																	K2	0.038993	0.00766213
																	t2	27.6565	5.2089
																	R2	0.999561	0.000301628
																	R2^2	0.999122	0.0006029

## Sheet: comparision
0.016	1	0.487545
0.016	1	0.31692
0.016	1	0.103674
0.016	2	0.332845
0.016	2	0.153221
0.016	2	0.0647554
0.021	1	0.18899
0.021	1	0.3176
0.021	1	0.170489
0.021	2	0.143177
0.021	2	0.153248
0.021	2	0.079109
0.027	1	0.194627
0.027	1	0.147038
0.027	1	0.172179
0.027	2	0.113697
0.027	2	0.114466
0.027	2	0.0994384
0.04	1	0.138704
0.04	1	0.138704
0.04	1	0.0883372
0.04	2	0.0799867
0.04	2	0.0799867
0.04	2	0.0479768
0.061	1	0.108653
0.061	1	0.0431541
0.061	1	0.0556384
0.061	2	0.0533575
0.061	2	0.0364351
0.061	2	0.0271872
